# Supplementary material
Source: PubMed Central journal article supplement (PMC5115164)
Supplement: jgv-97-378-s001.pdf [file jgv-97-378-s001.pdf]

TABLE S1

## PRIMERS AND PROBE FOR STUDY OF PKV

|    | <b>Primer/probe*</b>                                                                     | <b>Targeted region</b> | <b>Sequence (5'-3')</b>                                                                                             |
|----|------------------------------------------------------------------------------------------|------------------------|---------------------------------------------------------------------------------------------------------------------|
| 5  | Pankobuvirus_7185os<br>Pankobuvirus_7807oa<br>Pankobuvirus_7309is<br>Pankobuvirus_7516ia | 3D                     | GGTGGWCTYATHGASTACATGC<br>GTGTCNNGRTCCATSACHGGGTG<br>TGGAYTACAAGTGYTTTGGATGC<br>ATGATGGTGTTRAKGATRGARGTG            |
| 10 | PKV_332s<br>PKV_533a<br>PKV_505a_probe                                                   | 5'UTR                  | CGTGCTGAGTAATGGGATAGGAGAT<br>ACTCTATCAAGCAGTACATGGTCAAG<br>6-FAM-TGGATTCCC/ZEN/AGCCACGCAACCACAG-IBFQ                |
| 15 | PKV_VP1_2817os<br>PKV_VP1_4044oa<br>PKV_VP1_2884is<br>PKV_VP1_3936ia                     | VP1                    | TACTGGAARGTCACYAAYATGGCYAAYCAG<br>CAAAGTGRGTRCAGTTRTTRGTRGCAGAG<br>GGGTGATGAAYCCRCTYACYGG<br>GGTCYTCTAVGCAACGTADGCG |

\* Primers and probe were numbered according to the sequence NC\_001918.1.

20

25

30

TABLE S2

## PRIMERS USED FOR AMPLIFICATION OF COMPLETE GENOME OF EV-G8, EV-G9

| 35 | Primer**     | Targeted fragment      | Sequence (5'-3')           |
|----|--------------|------------------------|----------------------------|
|    | EVG-2os      |                        | TWAAACAGYCWGBGGGTTGT       |
|    | EVG-1267oa   | Fragment 1 (94-832)    | TCWGGHARYTTCCAMCACCANCC    |
|    | EVG-94is     |                        | TAGTACCTTTGTACGCCTGTTTT    |
|    | EVG-832ia    |                        | TTYTTRCTCATTTGCATHCCCAT    |
| 40 |              |                        |                            |
|    | EVG-482os    |                        | CCGGCCCCTGAATGYGGCTAA      |
|    | EVG-3390oa   | Fragment 2 (571-2965)  | GGGTKGCAAGRKGYCTRTTCA      |
|    | EVG-571is    |                        | ACCRACACTTTGGGTGTCCGTG     |
|    | EVG-2965ia   |                        | GGRTTWGCKGCASTTTGCCA       |
| 45 |              |                        |                            |
|    | EVG-2313os   |                        | GCTGGKTATRTKACYGGDTGGTWYC  |
|    | EVG-3421oa   | Fragment 3 (2395-3390) | TCTTCCCAYTCDASRTTBTCCCA    |
|    | EVG-2395is   |                        | TGGCWGCACARCCNAAAYTTYTC    |
|    | EVG-3390ia   |                        | GGGTKGCAAGRKGYCTRTTCA      |
| 50 |              |                        |                            |
|    | EVG-2313os   |                        | GCTGGKTATRTKACYGGDTGGTWYC  |
|    | EVG-5806oa   | Fragment 4 (3187-5419) | GGRAAGTTRTACATCATDGTKCG    |
|    | EV-G8-3187is |                        | TGCAAGCCAAAACAYATTAAG      |
|    | EV-G9-2679is |                        | GTGGAGAGCTTTTATTCTAGATC    |
| 55 | EVG-5419ia   |                        | TTCATCATBCCDACNCCAAARTCCAT |
|    | EVG-4833os   |                        | GAGAATAAYACCTTGAATGTGACAG  |
|    | EVG-7385oa   | Fragment 5 (5187-7373) | CATCCGGTGGGWGTRTTG         |
|    | EVG-5187is   |                        | GAGATYCCAGTAGATGAGAGRA     |
| 60 | EVG-7373ia   |                        | GTATTGHATCCAATTGAAGYTTWGG  |

\*\* Primers were named after virus, position [numbering based on the sequence HQ702854 (swine/K23/2008/HUN)], orientation [os: outer sense, is: inner sense, ia: inner antisense, oa: outer antisense].

65

70

TABLE S3

## EV TYPES AND AGES OF INFECTED PIGS

|     | Sample | EV type | Pig age<br>(months) | Sample | EV type | Pig age<br>(months) |
|-----|--------|---------|---------------------|--------|---------|---------------------|
| 75  | 744278 | G1      | 0.5                 | 724241 | G1      | 3                   |
|     | 724266 | G1      | 1                   | 734226 | G1      | 3                   |
|     | 724267 | G1      | 1                   | 714383 | G1      | 3                   |
|     | 724268 | G1      | 1                   | 714139 | G1      | 3.5                 |
| 80  | 714037 | G1      | 1                   | 714464 | G1      | 4                   |
|     | 714179 | G1      | 1                   | 724431 | G1      | 4                   |
|     | 714280 | G1      | 1                   | 724254 | G1      | 4.5                 |
|     | 724262 | G1      | 1                   | 714310 | G1      | 5                   |
|     | 724269 | G1      | 1                   | 714207 | G1      | 6                   |
| 85  | 724291 | G1      | 1                   | 724286 | G1      | 6                   |
|     | 724338 | G1      | 1                   | 734214 | G1      | 12                  |
|     | 724340 | G1      | 1                   | 714182 | G1      | 14.8                |
|     | 734099 | G1      | 1                   | 714133 | G1      | 20                  |
|     | 714057 | G1      | 1.5                 | 724317 | G1      | 48                  |
| 90  | 724379 | G1      | 1.5                 | 724327 | G1      | 48                  |
|     | 734043 | G1      | 1.5                 | 714038 | G6      | 1                   |
|     | 734207 | G1      | 1.5                 | 714180 | G6      | 1                   |
|     | 744019 | G1      | 1.5                 | 744167 | G6      | 1.1                 |
|     | 744020 | G1      | 1.5                 | 714432 | G6      | 1.5                 |
| 95  | 734006 | G1      | 2                   | 734041 | G6      | 1.5                 |
|     | 714107 | G1      | 2                   | 734042 | G6      | 1.5                 |
|     | 714218 | G1      | 2                   | 714404 | G6      | 1.5                 |
|     | 734004 | G1      | 2                   | 714434 | G6      | 1.5                 |
|     | 734005 | G1      | 2                   | 714435 | G6      | 1.5                 |
| 100 | 734016 | G1      | 2                   | 724362 | G6      | 1.5                 |
|     | 734038 | G1      | 2                   | 734204 | G6      | 1.5                 |
|     | 734056 | G1      | 2                   | 734206 | G6      | 1.5                 |
|     | 734060 | G1      | 2                   | 734235 | G6      | 1.5                 |
|     | 734103 | G1      | 2                   | 744121 | G6      | 1.5                 |
| 105 | 734132 | G1      | 2                   | 744123 | G6      | 1.5                 |
|     | 734137 | G1      | 2                   | 744266 | G6      | 1.5                 |
|     | 734139 | G1      | 2                   | 714110 | G6      | 2                   |
|     | 734140 | G1      | 2                   | 714112 | G6      | 2                   |
|     | 734141 | G1      | 2                   | 714445 | G6      | 2                   |
| 110 | 734184 | G1      | 2                   | 734148 | G6      | 2                   |
|     | 744059 | G1      | 2                   | 734151 | G6      | 2                   |
|     | 734055 | G1      | 2                   | 734154 | G6      | 2                   |
|     | 724182 | G1      | 2.5                 | 744100 | G6      | 2                   |
|     | 724239 | G1      | 2.5                 | 744101 | G6      | 2                   |
| 115 |        |         |                     |        |         |                     |

|     | Sample | EV type | Pig age<br>(months) | Sample | EV type | Pig age<br>(months) |
|-----|--------|---------|---------------------|--------|---------|---------------------|
| 120 | 744107 | G6      | 2                   | 744155 | G8      | 3.5                 |
|     | 744110 | G6      | 2                   | 714171 | G9      | 4                   |
|     | 734261 | G6      | 2.5                 | 724054 | G9      | 4                   |
|     | 744263 | G6      | 3                   | 734116 | G11     | 4                   |
|     | 714090 | G6      | 3.5                 | 744081 | G8      | 4                   |
| 125 | 724427 | G6      | 5                   | 714265 | G11     | 5                   |
|     | 744032 | G6      | 13                  | 714467 | G9      | 5                   |
|     | 744034 | G6      | 13                  | 714222 | G12     | 5                   |
|     | 734212 | G3      | 0.5                 | 714361 | G4      | 5                   |
|     | 734213 | G3      | 0.5                 | 714405 | G14     | 5                   |
| 130 | 714118 | G8      | 1                   | 714407 | G14     | 5                   |
|     | 714036 | G12     | 1                   | 724307 | G15     | 6                   |
|     | 744071 | G11     | 1.5                 | 744188 | G3      | 6                   |
|     | 714106 | G4      | 2                   | 714451 | G12     | 8                   |
|     | 714108 | G4      | 2                   | 734128 | G11     | 12                  |
| 135 | 744103 | G11     | 2                   | 734124 | G10     | 12.3                |
|     | 744106 | G10     | 2                   | 734072 | G4      | 12.5                |
|     | 734237 | G11     | 2.5                 | 734123 | G10     | 13                  |
|     | 734293 | G3      | 2.5                 | 714152 | G9      | 18                  |
|     | 734294 | G3      | 2.5                 | 714232 | G4      | 24                  |
| 140 | 714075 | G8      | 3                   | 744257 | G11     | 24.5                |
|     | 734087 | G9      | 3                   | 714270 | G13     | 30                  |
|     | 724242 | G11     | 3                   | 724118 | G8      | 38                  |
|     | 734278 | G9      | 3                   |        |         |                     |

145

150

155

FIGURE S1

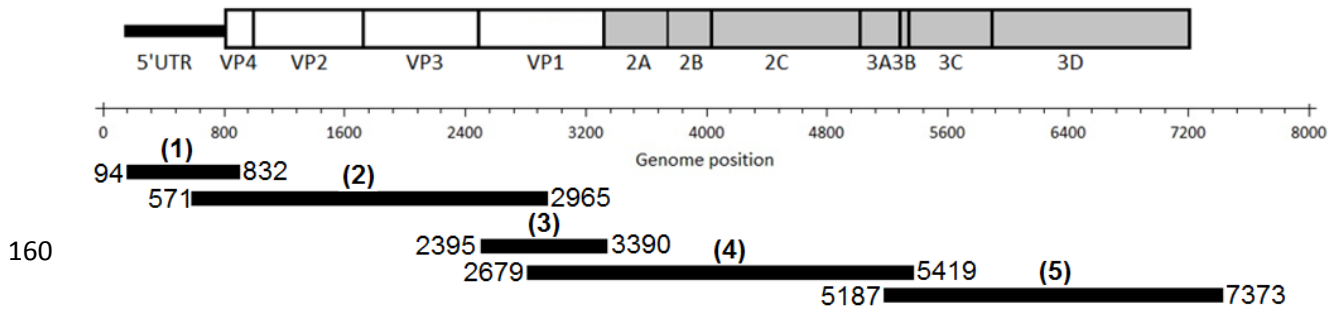

Schematic diagram of the EV-G genome and amplified fragments (in parentheses) with numbers indicating the positions of each fragment for complete genome of novel types.
